# Supplementary material for: Temperature-modulated solution-based synthesis of copper oxide nanostructures for glucose sensing
Source: Royal Society of Chemistry journal article supplement (doi:10.1039/d3ma00149k), 2023-01-01
Supplement: d3ma00149k1.pdf [file d3ma00149k1.pdf]

# Temperature-modulated Solution-based Synthesis of Copper Oxide Nanostructures for Glucose Sensing Supplementary Information

Yujiang Zhu,<sup>†</sup> Carolina Vigil Hernández,<sup>†</sup> Curran Kalha,<sup>†</sup> Nathalie K. Fernando,<sup>†</sup>  
Steve Firth,<sup>†</sup> Gemma-Louise Davies,<sup>†</sup> Katarzyna Bialas,<sup>‡</sup> Despina Moschou,<sup>‡</sup>  
and Anna Regoutz<sup>\*,†</sup>

<sup>†</sup>*Department of Chemistry, University College London, 20 Gordon Street, London  
WC1H 0AJ, U.K.*

<sup>‡</sup>*Centre for Biosensors, Bioelectronics and Biodevices (C3Bio), Department of Electronic  
and Electrical Engineering, University of Bath, Claverton Down, Bath BA2 7AY, U.K.*

E-mail: a.regoutz@ucl.ac.uk

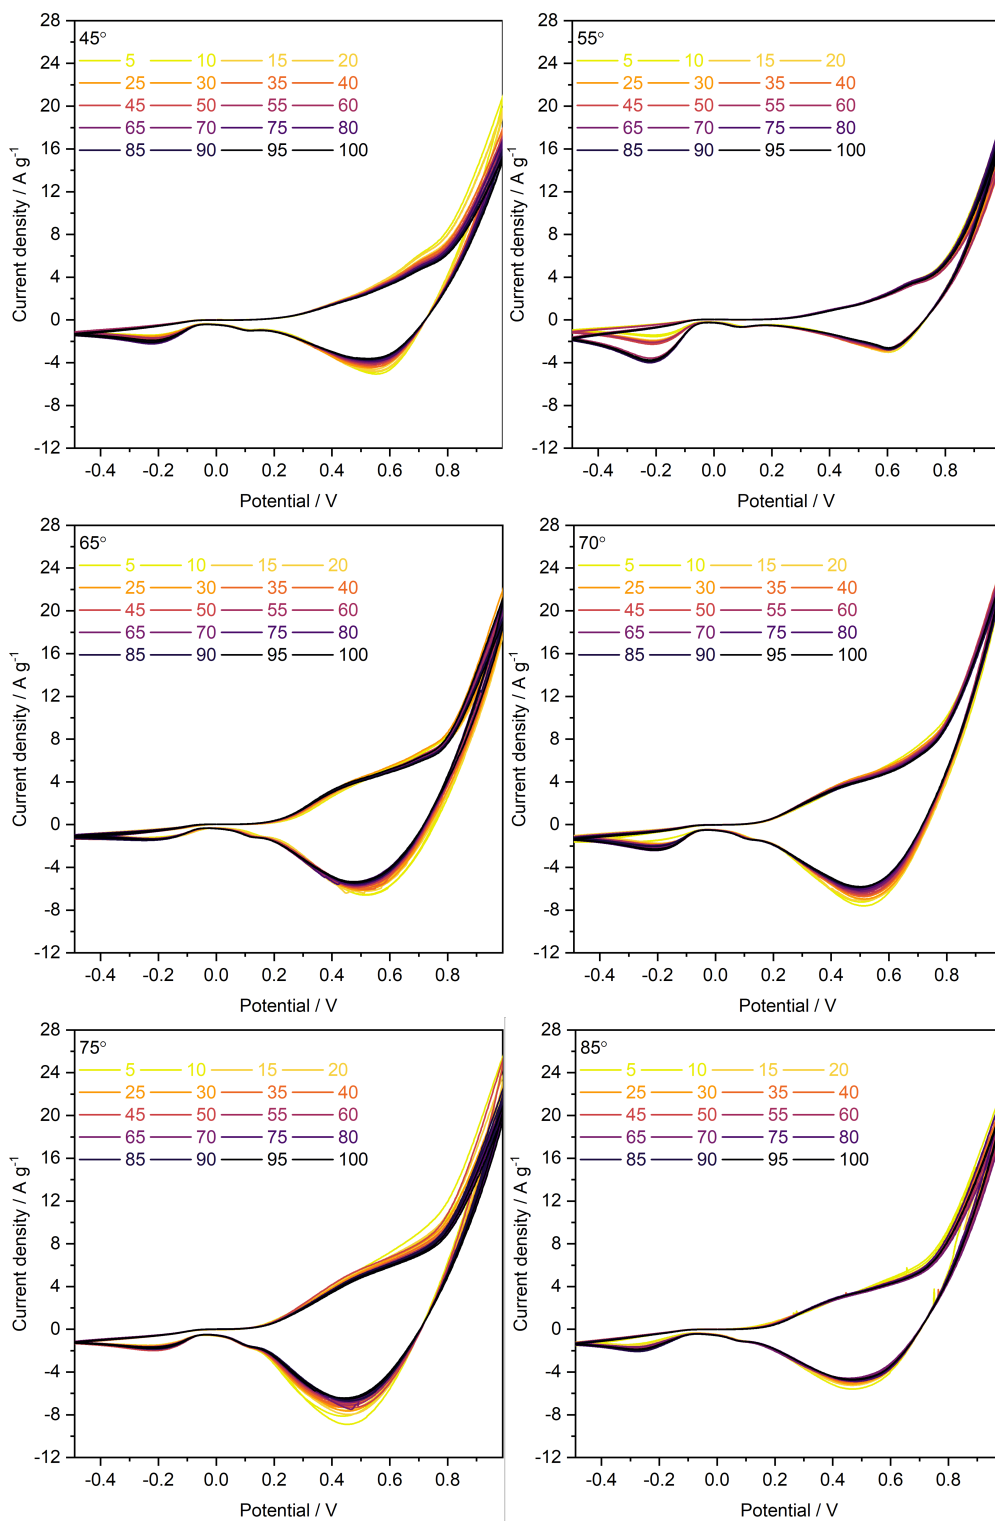

**Figure S1:** Cyclic voltammograms of CuO nanostructures synthesised at temperatures  $T$  from 45 to 85°C collected at 0.05 V/s in 0.1 M NaOH solution with 1 mM glucose over 100 cycles with every fifth cycle plotted.

**Table S1:** Redox peak position and peak current density of CuO nanostructures synthesised at temperatures  $T$  from 45 to 85°C for the 30<sup>th</sup> and 100<sup>th</sup> CV cycles. For the sample synthesised at 65°C an average of the 29<sup>th</sup> and 31<sup>st</sup> cycle was used as the data for the 30<sup>th</sup> sample represented an outlier.

| $T / ^\circ\text{C}$ | Peak position / V      |                         | Peak current density / $\text{Ag}^{-1}$ |                         |
|----------------------|------------------------|-------------------------|-----------------------------------------|-------------------------|
|                      | 30 <sup>th</sup> cycle | 100 <sup>th</sup> cycle | 30 <sup>th</sup> cycle                  | 100 <sup>th</sup> cycle |
| 45                   | 0.71                   | 0.72                    | 5.70                                    | 4.86                    |
| 55                   | 0.70                   | 0.69                    | 3.44                                    | 3.48                    |
| 65                   | 0.73                   | 0.72                    | 6.54                                    | 6.12                    |
| 70                   | 0.45                   | 0.45                    | 3.76                                    | 3.58                    |
| 75                   | 0.48                   | 0.48                    | 4.92                                    | 4.70                    |
| 85                   | 0.45                   | 0.44                    | 3.14                                    | 3.08                    |

**Table S2:** Lattice parameters  $a$ ,  $b$ ,  $c$  and angle  $\beta$  of as-prepared CuO nanostructures determined from Le Bail refinement as well as for a CuO reference (ICSD Coll. Code: 67850). All values of as-prepared CuO nanostructures are given with an estimated error from the refinement. The standard deviation calculated by TOPAS is also included in the table.

| $T / ^\circ\text{C}$ | $a / \text{\AA}$ | $b / \text{\AA}$ | $c / \text{\AA}$ | $\beta / ^\circ$ |
|----------------------|------------------|------------------|------------------|------------------|
| 45                   | 4.70(1)          | 3.43(1)          | 5.14(1)          | 99.26(1)         |
| 55                   | 4.70(2)          | 3.43(2)          | 5.15(3)          | 99.20(2)         |
| 65                   | 4.70(2)          | 3.43(1)          | 5.14(2)          | 99.21(1)         |
| 70                   | 4.71(2)          | 3.44(1)          | 5.16(2)          | 99.09(1)         |
| 75                   | 4.71(2)          | 3.44(1)          | 5.16(2)          | 99.11(1)         |
| 85                   | 4.70(1)          | 3.43(1)          | 5.15(2)          | 99.21(1)         |
| Ref.                 | 4.67975          | 3.43144          | 5.13626          | 99.2625          |

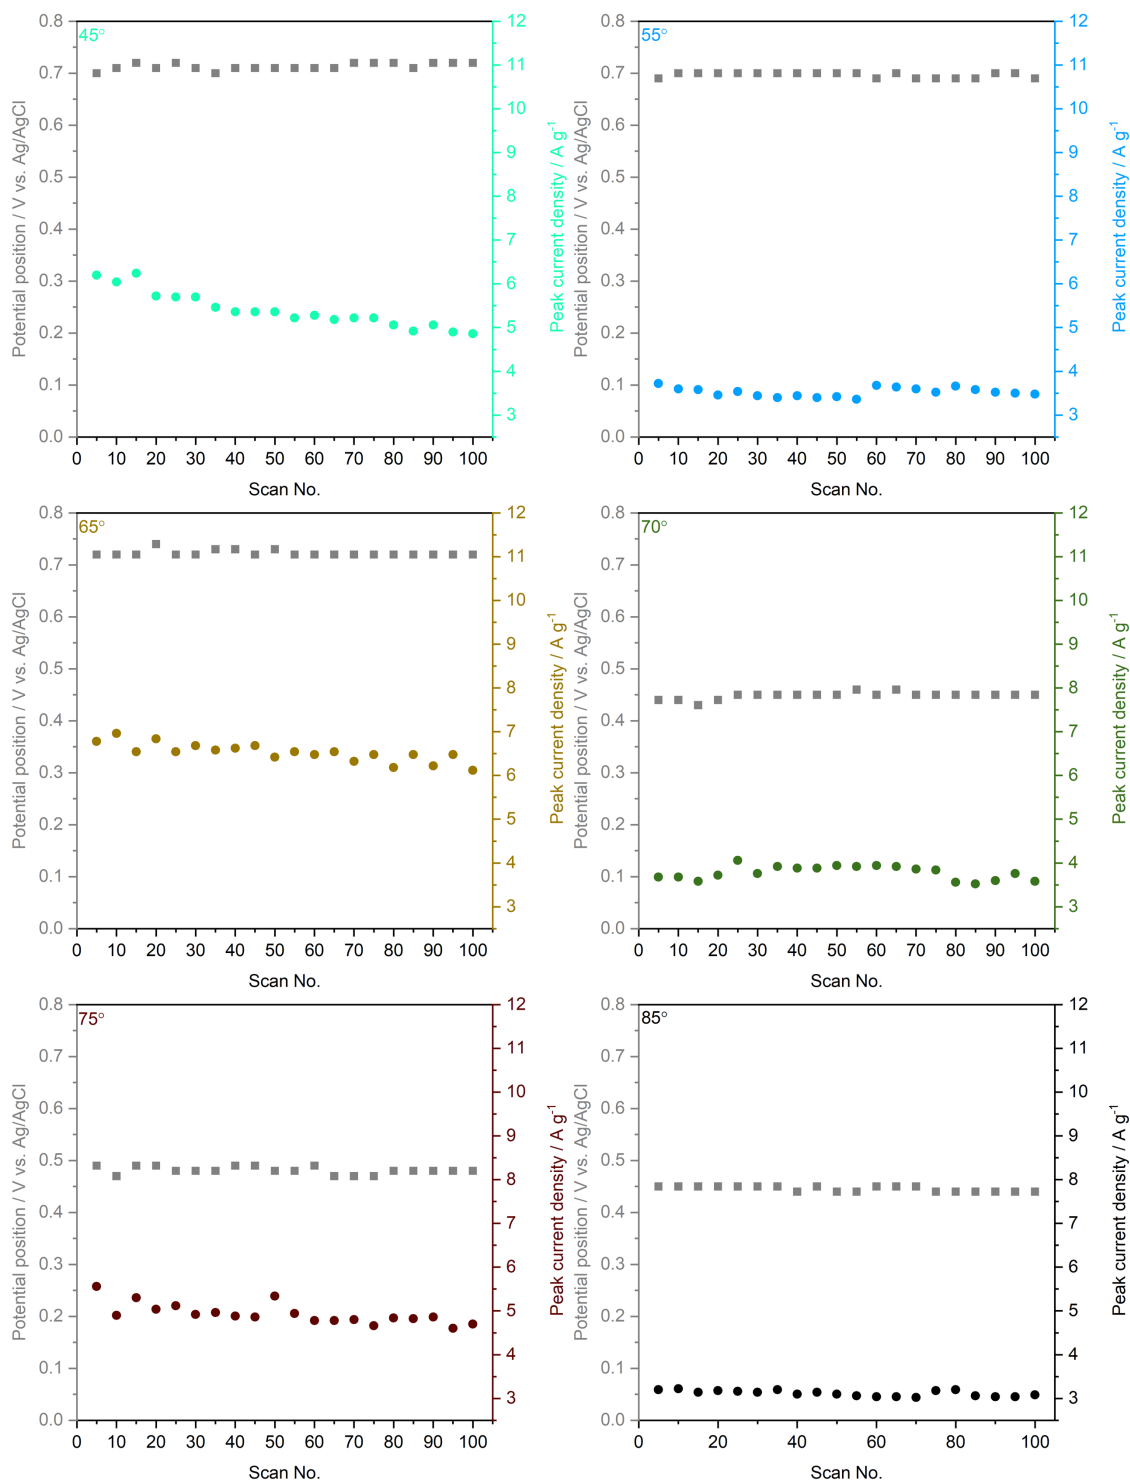

**Figure S2:** Values for the redox peak position and the peak current density of CuO nanostructures synthesised at temperatures  $T$  from 45 to 85°C from every fifth cycle of the 100 cyclic voltammograms collected at 0.05 V/s in 0.1 M NaOH solution with 1 mM glucose. For the sample synthesised at 65°C an average of the 29<sup>th</sup> and 31<sup>st</sup> cycle was used as the data for the 30<sup>th</sup> sample represented an outlier.

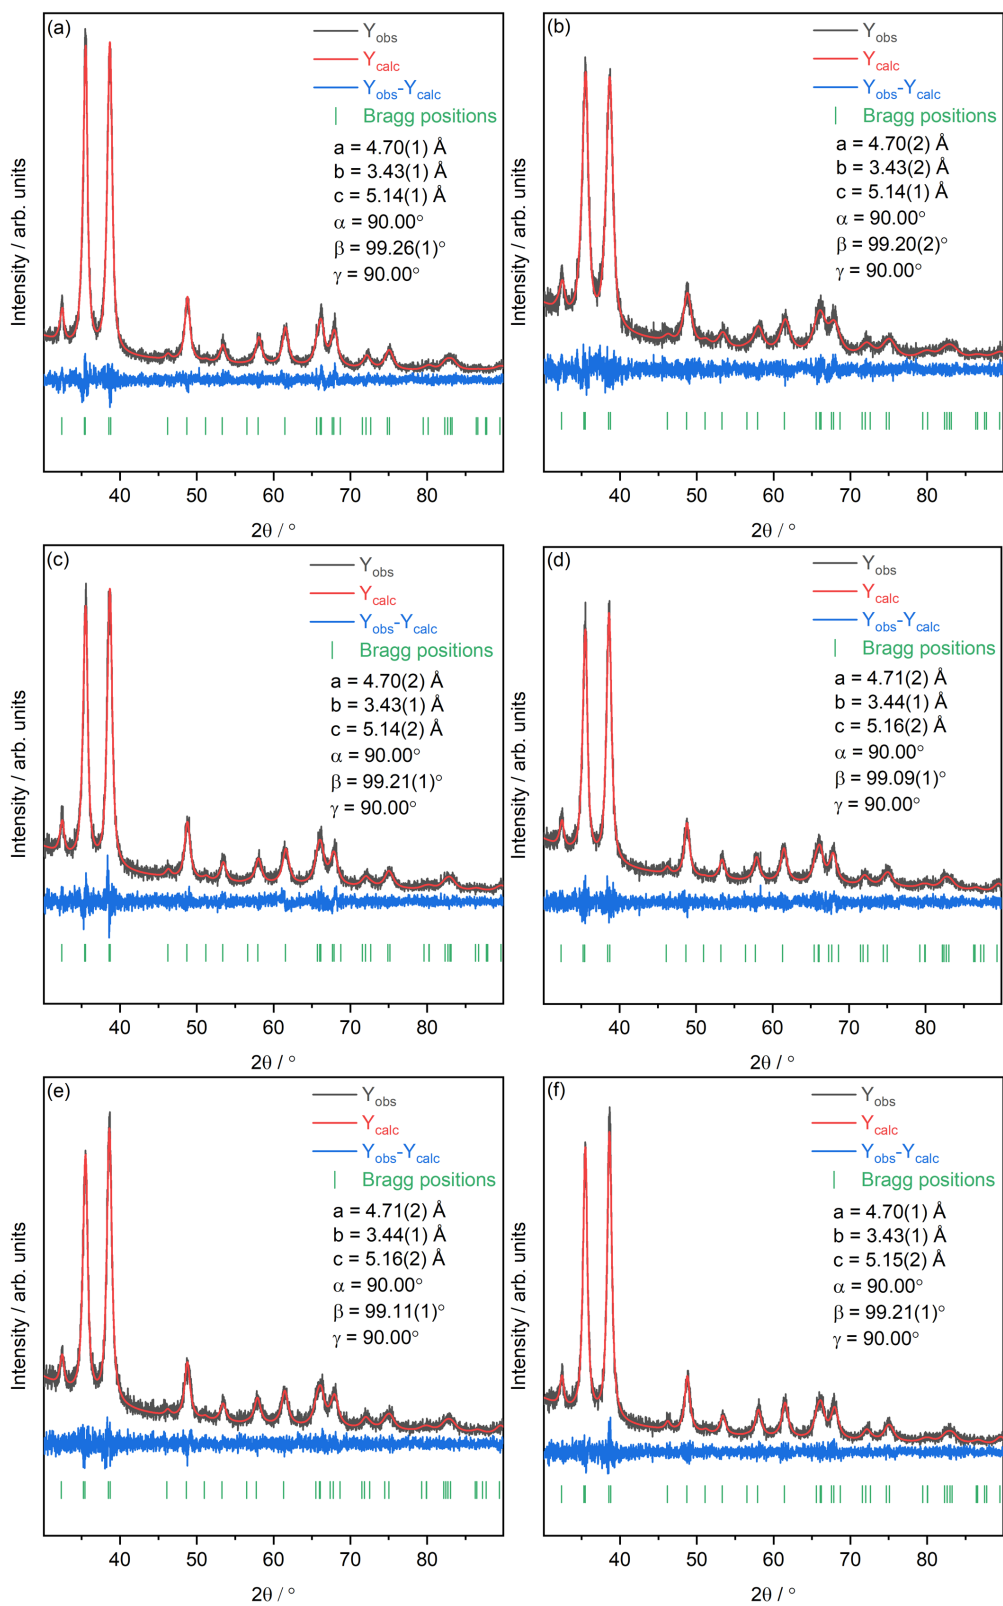

**Figure S3:** Le Bail refinements of the collected XRD patterns of CuO nanostructures synthesised at (a) 45, (b) 55, (c) 65, (d) 70, (e) 75, and (f) 85°C.  $Y_{obs}$  is the raw data from XRD and  $Y_{calc}$  is the Le Bail refinement.

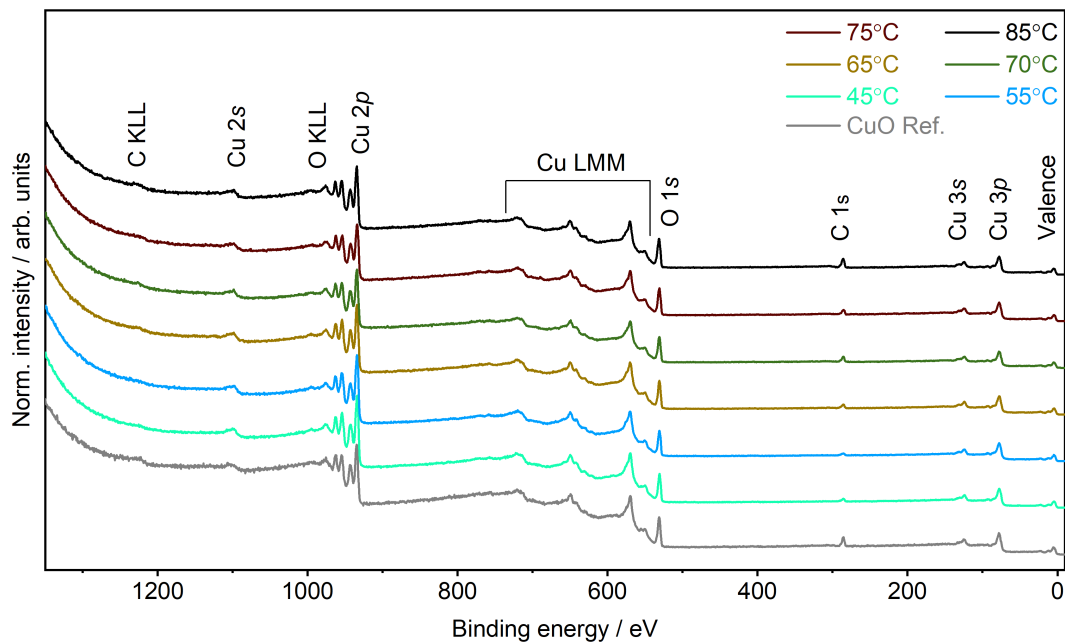

**Figure S4:** X-ray photoelectron survey spectra of CuO nanostructures synthesised from 45 to 85°C and of a CuO reference powder. All spectra are normalised [0 to 1] and vertically stacked.

**Table S3:** Relative atomic ratios between Cu:O<sub>Oxide</sub> and O<sub>Oxide</sub>:O<sub>Other</sub> from peak fit analysis of the Cu 2p<sub>3/2</sub> and O 1s XPS core level spectra for nanostructures synthesised at varying temperatures  $T$  in rel.at%. All values are given with an estimated error of  $\pm 2$  rel.at%.

| $T / ^\circ\text{C}$ | Cu : O <sub>Oxide</sub> | O <sub>Oxide</sub> : O <sub>Others</sub> |
|----------------------|-------------------------|------------------------------------------|
| 45                   | 48 : 52                 | 69 : 31                                  |
| 55                   | 50 : 50                 | 69 : 31                                  |
| 65                   | 49 : 51                 | 64 : 36                                  |
| 70                   | 49 : 51                 | 53 : 47                                  |
| 75                   | 53 : 47                 | 52 : 48                                  |
| 85                   | 46 : 54                 | 56 : 44                                  |

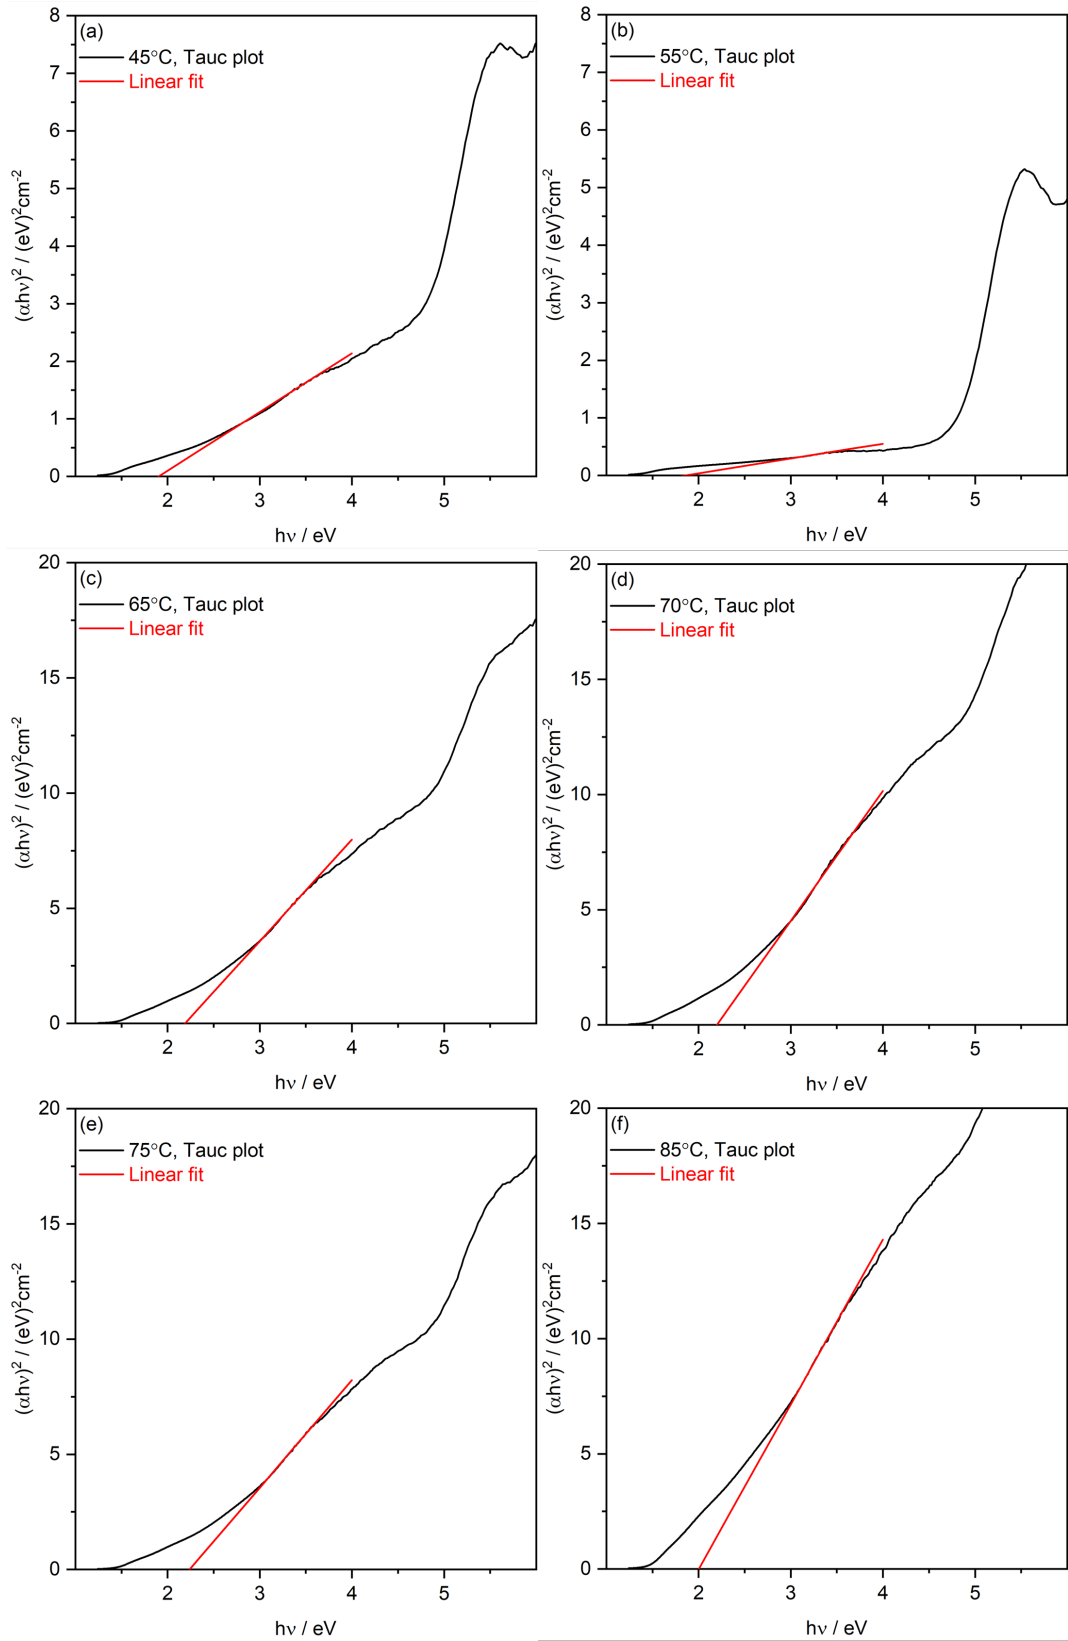

**Figure S5:** Tauc plots of  $(\alpha h\nu)^2$  vs.  $h\nu$  for CuO nanostructures synthesised at (a) 45, (b) 55, (c) 65, (d) 70, (e) 75, and (f) 85°C. Red lines are linear fit ranges used to obtain optical band gap  $E_g$  values.

**Table S4:** Optical band gap  $E_g$  from Tauc analysis of UV-vis spectroscopy and VBM- $E_F$  separation from fits to the XPS valence band spectra. All values are given with an estimated error of  $\pm 0.10$  eV.

| $T / ^\circ\text{C}$ | $E_g / \text{eV}$ | VBM- $E_F / \text{eV}$ |
|----------------------|-------------------|------------------------|
| 45                   | 1.76              | 0.34                   |
| 55                   | 1.85              | 0.29                   |
| 65                   | 2.19              | 0.12                   |
| 70                   | 2.20              | 0.15                   |
| 75                   | 2.24              | 0.17                   |
| 85                   | 2.00              | 0.46                   |
